# Supplementary material for: Machine Learning-Based Electroencephalographic Phenotypes of Schizophrenia and Major Depressive Disorder
Source: Front Psychiatry. 2021 Oct 13;12:745458. doi: 10.3389/fpsyt.2021.745458 (PMC8549692; doi:10.3389/fpsyt.2021.745458)
Supplement: Supplementary file 2 [file Data_Sheet_1.xlsx]

## Sheet: Sheet1
NO	group1sz2mdd3hc	sex	age	Edu	Durationofillness	positive	negative	general	total	drug	HAMD	HAMA	BDI	ampl_witdth	N1_FZ	N1_CZ	N1_PZ	P3_FZ	P3_CZ	P3_PZ	width_sum	N100Fz_peak	N100Fz_lat	N100Cz_Peak	N100Cz_lat	N100Pz_peak	N100Pz_lat	AP300_Fz_peak	AP300_Fz_lat	AP300_Cz_peak	AP300_Cz_lat	AP300_Pz_peak	AP300_Pz_lat	N1_LeftSFG	N1_RightSFG	N1_LeftMFGmiddle	N1_RightMFGmiddle	N1_LeftMFGmedial	N1_RightMFGmedial	N1_LeftIFG	N1_RightIFG	N1_LeftSTG	N1_RightSTG	N1_LeftIPL	N1_RightIPL	N1_Leftprecuneus	N1_Rightprecuneus	P3_LeftSFG	P3_RightSFG
1	1	2	27	16	22	28	11	44	83	Blonaserin	#NULL!	#NULL!	#NULL!	#NULL!	215.426	251.757	195.688	14.4727	87.0543	230.683	995.08	-5.3	112	-5.8	111	-4.01	107	0.78	326	2.02	327	3.19	354	0.560598	0.526764	0.289421	0.463665	0.620059	0.649211	0.321183	0.766257	0.312796	0.801822	0.400195	0.311431	1.859	0.925126	0.86146	0.878081
2	1	2	42	13	38	35	24	70	129	olanzapine	#NULL!	#NULL!	#NULL!	#NULL!	256.152	375.526	364.468	281.75	499.118	628.25	2405.26	-5.05	91	-6.06	113	-5.79	111	4.82	351	5.77	343	4.93	336	0.48261	0.493698	0.447519	0.324607	0.520708	0.50393	0.794557	0.43876	0.439065	0.42332	0.105922	0.166202	0.375055	0.410785	0.876264	0.797368
3	1	2	58	16	52	35	28	56	119	amisulpride	#NULL!	#NULL!	#NULL!	#NULL!	202.172	285.093	264.006	353.003	203.293	200.949	1508.52	-4.5	109	-7.22	104	-6.35	102	5.93	400	4.41	389	3.72	359	0.760244	0.788051	0.418778	0.331114	0.668917	0.731627	0.289403	0.510513	0.719009	0.70924	0.651468	0.339752	0.830375	0.679838	0.962873	1.00716
4	1	2	35	13	31	34	29	66	129		#NULL!	#NULL!	#NULL!	#NULL!	326.878	478.482	504.527	407.58	798.922	1185.78	3702.17	-7.15	95	-9.02	96	-8.1	118	5.7	332	7.83	379	10.03	361	0.989872	0.448291	0.651255	0.21972	0.769283	0.505575	0.78917	0.452111	0.681172	0.748877	0.266419	0.274407	0.863357	1.28599	1.47212	0.859591
5	1	2	67	6	24	22	30	55	107	Queta,Pali,Amisul	#NULL!	#NULL!	#NULL!	#NULL!	566.726	481.005	226.231	469.495	373.781	410.721	2527.96	-12.26	96	-11.96	98	-6.49	98	4.82	445	4.28	381	4.8	384	1.85448	5.26334	0.644638	3.1387	2.50424	3.84778	0.72505	2.77465	1.05238	2.23297	1.43018	1.22112	2.16537	2.10483	0.922453	1.81264
6	1	2	35	14	26	30	14	45	89		#NULL!	#NULL!	#NULL!	#NULL!	215.235	283.027	315.832	456.316	422.738	461.595	2154.74	-4.59	121	-5.91	120	-6.02	114	7.7	358	7.02	350	6.27	376	0.514641	0.380836	0.309878	0.230062	0.433657	0.350667	0.274455	0.261099	0.259082	0.281142	0.258061	0.187501	0.54279	0.489495	0.809796	0.742622
7	1	1	36	18	34	30	11	45	86	Risperidone	#NULL!	#NULL!	#NULL!	#NULL!	273.898	307.706	187.819	33.8351	136.754	190.651	1130.66	-6	97	-6.24	98	-3.51	114	1.04	474	2.27	438	2.65	430	1.68685	1.02814	0.930871	0.544097	1.39591	1.03777	0.55935	0.443573	0.377035	0.425103	0.668533	0.208509	0.614221	0.502078	0.550783	0.522621
8	1	2	46	16	30	41	26	56	123	Clozapine	#NULL!	#NULL!	#NULL!	#NULL!	398.288	387.037	450.878	375.705	412.478	772.89	2797.28	-8.07	85	-8.91	84	-8.98	102	7.44	359	9.73	362	11.23	366	2.55198	2.91467	1.37976	1.67623	3.04912	3.23179	1.77878	1.46546	1.34054	1.11367	0.804938	0.564292	1.26269	1.10883	1.92217	1.94305
10	1	2	56	9	53	31	19	43	93	Quetapine	#NULL!	#NULL!	#NULL!	#NULL!	414.494	359.981	134.423	531.303	1020.41	481.413	2942.03	-7.38	100	-7.02	116	-2.63	123	5.38	333	8.03	308	4.56	357	1.22774	1.50301	1.32651	1.2887	1.32519	1.5114	2.06431	1.84301	2.11127	1.67253	1.61576	1.7024	2.70223	1.66783	4.13224	4.62925
11	1	1	47	13	41	36	23	57	116	Olan,Amisul	#NULL!	#NULL!	#NULL!	#NULL!	212.942	306.941	336.634	864.478	1209.23	1316.38	4246.61	-5.86	93	-5.32	94	-4.38	122	10.1	395	11.16	395	10.83	334	0.878139	1.47866	0.691181	1.51258	0.828705	0.856596	1.03032	1.40669	0.843296	0.95596	0.473686	0.346559	1.71504	0.753932	5.15851	10.856
12	1	2	82	13	64	29	28	52	109	Amisul,Queta	#NULL!	#NULL!	#NULL!	#NULL!	318.93	378.952	317.005	487.405	638.968	694.083	2835.34	-5.99	92	-7.34	94	-6.58	95	6.38	397	7.24	392	6.19	395	0.813319	1.00894	0.711327	1.24259	1.0306	1.0113	1.2405	2.78903	1.15035	3.00933	0.422902	0.220184	0.586044	0.416477	0.645429	0.833697
13	1	2	30	15	22	19	16	48	83	Olanzapine	#NULL!	#NULL!	#NULL!	#NULL!	250.918	364.729	333.21	293.602	580.865	711.82	2535.14	-8.61	95	-9.54	97	-6.32	101	4.42	332	6.7	331	7.41	335	0.671988	0.689513	0.417128	0.401621	0.787128	0.785715	0.542716	0.532962	0.470201	0.478026	0.178463	0.178983	0.454755	0.482937	0.864895	1.02787
14	1	1	19	10	16	13	25	52	90	Quetapine	#NULL!	#NULL!	#NULL!	#NULL!	54.681	137.438	167.455	344.544	893.587	795.958	2393.66	-1.98	104	-2.98	99	-4.05	85	4.09	449	8.48	423	6.5	373	2.43121	2.17476	1.72979	1.60915	1.76575	1.58538	1.53579	1.51008	0.921954	0.782247	0.230394	0.131577	0.676108	0.755327	2.39927	3.13186
15	1	1	41	16	38	42	15	54	111	Olanzapine	#NULL!	#NULL!	#NULL!	#NULL!	256.525	399.655	417.144	8.0546	268.557	706.561	2056.5	-5.38	93	-6.82	90	-6.31	83	0.76	439	3.42	316	6.55	328	0.809427	0.92939	0.696581	0.787262	0.912565	1.0145	0.941224	1.25043	0.861601	0.901793	0.402105	0.151842	0.837303	0.512639	1.69518	1.30233
16	1	1	23	12	20	29	29	68	126		#NULL!	#NULL!	#NULL!	#NULL!	98.136	206.713	296.169	397.168	974.611	1187.04	3159.84	-2.99	92	-5.09	95	-6.38	94	7.44	334	11.3	317	13.11	300	1.8956	1.57233	1.30026	1.60212	1.86452	1.83792	1.64761	4.3523	1.07629	2.74685	0.350775	0.337813	0.403288	0.721277	3.08581	3.43398
17	1	1	37	13	35	28	26	66	120	Aripiprazole	#NULL!	#NULL!	#NULL!	#NULL!	398.104	504.053	452.28	778.672	962.854	1085.15	4181.11	-6.68	98	-8.27	100	-6.84	100	9.49	303	10.6	302	10.9	317	1.13439	1.89533	0.593146	1.0935	0.885957	1.24127	0.974158	1.3771	0.864287	1.04608	0.418967	0.214342	0.536527	0.353194	0.7094	1.07458
18	1	2	39	12	15	31	28	40	99	Olanzapine	#NULL!	#NULL!	#NULL!	#NULL!	367.461	429.759	344.93	804.308	888.134	842.847	3677.44	-7.11	101	-7.78	116	-6.44	123	9.05	315	9.64	324	7.54	342	4.80093	2.38349	2.81279	1.24712	3.07854	1.99514	2.56144	0.700466	1.52475	0.523095	0.537521	0.609896	0.806865	0.719615	10.6234	6.70106
19	1	2	54	18	52	32	9	42	83	Paliperidone	#NULL!	#NULL!	#NULL!	#NULL!	638.343	643.926	536.287	905.73	1319.42	1407.36	5451.06	-12.96	100	-12.98	99	-10.79	98	9.57	350	14.87	350	15.05	352	5.07128	1.85272	3.66808	1.5372	3.9476	2.21002	5.11578	2.97538	3.41392	2.37144	0.195116	0.260107	0.626186	0.739247	3.95555	2.99727
21	1	1	23	10	14	32	16	63	111	Amisulpride	#NULL!	#NULL!	#NULL!	#NULL!	313.18	289.187	167.201	166.504	344.762	559.775	1840.61	-7.41	103	-5.97	102	-3.42	99	1.94	349	2.91	343	4.03	348	1.07994	1.35775	0.526191	0.669466	1.2603	1.31998	0.509908	0.51607	0.496283	0.647251	0.233633	0.826526	0.707285	0.738165	0.515371	0.455821
22	1	2	29	13	26	32	18	48	98	Quetapine, Paliperidone, Amisu	#NULL!	#NULL!	#NULL!	#NULL!	124.82	169.971	203.401	401.267	263.261	247.474	1410.19	-5	102	-5.45	104	-5.47	108	6.85	363	5.58	362	5.16	360	0.295159	0.299302	0.207404	0.185585	0.346542	0.361386	0.279411	0.27466	0.238762	0.341992	0.389904	0.430983	1.11594	1.45232	0.532477	0.535131
23	1	1	19	10	16	21	16	41	78	Aripiprazole	#NULL!	#NULL!	#NULL!	#NULL!	316.06	329.143	439.386	167.741	573.266	839.066	2664.66	-7.97	133	-6.96	106	-7.63	110	3.9	369	3.81	341	7.62	341	3.48078	5.85383	1.47959	3.14094	3.75624	4.40328	0.789298	2.01287	0.711202	1.19076	1.57397	0.617265	2.07936	1.95098	5.58814	7.59029
24	1	2	24	16	21	32	25	48	105	Olanzapine	#NULL!	#NULL!	#NULL!	#NULL!	271.337	328.519	265.345	43.8398	263.805	549.908	1722.75	-4.83	94	-5.31	100	-4.51	109	1.3	339	3.79	333	4.35	334	0.454392	0.830617	0.217066	0.977728	0.38021	0.51571	0.134847	1.43677	0.220297	1.33462	0.295305	0.177452	0.473588	0.771652	0.492543	0.555423
25	1	2	31	16	25	29	12	61	102	Quetapine, Paliperidone	#NULL!	#NULL!	#NULL!	#NULL!	300.778	359.45	299.069	529.645	987.982	1126.57	3603.49	-4.1	131	-5.81	100	-5.37	99	8.16	326	10.98	326	10.63	351	0.476182	1.75578	0.340824	1.2086	0.646225	1.26978	0.832765	1.33789	0.659385	1.16177	0.177916	0.165403	0.220741	0.272437	1.50856	3.93765
26	1	1	26	13	23	19	35	66	120		#NULL!	#NULL!	#NULL!	#NULL!	224.41	283.787	374.267	968.207	1300.42	1273.29	4424.38	-6.12	118	-7.55	115	-6.54	115	14.03	351	14.13	334	13.74	325	1.02175	1.00631	0.813482	0.620231	0.982236	0.884738	1.04819	0.530902	1.13487	0.805615	0.355955	0.653984	1.09309	1.35196	2.78749	2.51777
27	1	2	25	13	18	25	24	47	96	Aripiprazole	#NULL!	#NULL!	#NULL!	#NULL!	287.346	443.263	508.486	297.356	642.296	1212.55	3391.3	-5.55	134	-7.52	130	-6.97	124	4.34	341	7.14	338	8.61	333	0.848787	0.470107	0.446115	0.212408	0.765468	0.576342	0.308829	0.264124	0.178027	0.406001	0.127157	0.115307	0.405396	0.308803	2.14431	1.20867
28	1	1	30	16	26	34	11	46	91	Olanzapine	#NULL!	#NULL!	#NULL!	#NULL!	441.246	497.102	314.771	497.22	556.636	768.433	3075.41	-7.68	124	-8.43	123	-4.63	124	4.76	422	7.46	350	7.13	348	0.758734	0.721557	0.648417	0.718781	0.884441	0.812551	1.16011	0.827873	1.60356	0.968447	0.395702	0.863077	0.720005	0.564888	1.83756	1.50605
29	1	2	36	18	31	36	10	59	105	Olanzapine	#NULL!	#NULL!	#NULL!	#NULL!	52.894	239.879	140.653	660.13	681.477	398.576	2173.61	-1.39	95	-5.57	104	-3.78	107	8.66	337	7.62	301	5.07	296	2.36057	4.61033	1.34624	2.32707	2.65538	3.51595	1.12626	1.28676	0.750842	0.929387	0.879618	1.30198	0.953912	1.91982	1.31768	1.94731
31	1	1	46	14	39	26	24	62	112	Olanzapine	#NULL!	#NULL!	#NULL!	#NULL!	372.249	362.897	263.009	364.998	376.01	239.297	1978.46	-7.86	112	-9.07	111	-7.71	109	4.93	276	4.46	324	3.24	323	1.54514	1.17259	0.927512	0.998017	1.37276	1.05666	0.889704	1.05629	0.507925	0.879669	0.250872	0.146731	0.9106	0.643697	1.50971	3.2896
32	1	2	54	16	28	23	13	40	76	Paliperidone	#NULL!	#NULL!	#NULL!	#NULL!	173.896	172.19	86.712	56.1833	166.242	428.973	1084.19	-3.77	106	-3.11	106	-3.24	136	1.89	460	1.89	353	4.14	471	0.363253	0.562906	0.21814	0.353828	0.412905	0.495073	0.321152	0.382875	0.394175	0.327275	0.434854	0.222365	1.21135	0.644643	0.920249	1.94947
33	1	2	53	3	24	25	14	52	91		#NULL!	#NULL!	#NULL!	#NULL!	107.96	131.945	152.414	27.2069	102.987	241.814	764.326	-8.46	114	-7.7	114	-5.27	114	10.34	382	9.04	378	7.8	411	1.25611	1.1206	0.699551	0.961459	1.27886	1.10771	0.806027	1.71002	0.860696	1.27515	0.32153	0.196995	0.660358	0.496832	3.9723	2.76094
34	1	2	24	14	22	23	17	58	98	Aripiprazole	#NULL!	#NULL!	#NULL!	#NULL!	396.561	427.193	367.431	769.093	949.049	925.92	3835.25	-3.99	114	-4.6	114	-4.58	113	1.07	276	1.59	273	2.98	340	0.456925	0.421976	0.316382	0.292625	0.459295	0.429458	0.344784	0.407433	0.431508	0.422211	0.280812	0.0875	0.208168	0.160231	0.313751	0.307353
36	1	2	27	12	23	29	12	48	89	Quetapine	#NULL!	#NULL!	#NULL!	#NULL!	240.81	337.369	150.16	226.642	287.149	351.518	1593.65	-4.65	91	-5.5	93	-3.28	93	4.39	359	5.39	355	3.74	353	1.38657	0.640769	1.46039	0.385519	1.16153	0.891531	2.34127	0.597356	1.95071	0.515053	0.699268	0.477158	0.952338	0.674203	1.11234	1.05149
37	1	1	21	14	19	31	17	50	98	Olanzapinen	#NULL!	#NULL!	#NULL!	#NULL!	128.592	124.11	129.005	320.971	575.327	813.75	2091.76	-2.21	95	-1.97	84	-2.31	74	4.19	347	5.69	306	6.39	307	0.254073	0.239493	0.223467	0.184591	0.263903	0.273789	0.381454	0.363544	0.256757	0.417549	0.15922	0.136865	0.228033	0.261228	0.386428	0.331437
38	1	1	23	8	21	33	24	52	109	Olanzapine	#NULL!	#NULL!	#NULL!	#NULL!	240.645	291.529	297.72	32.1137	167.554	461.119	1490.68	-5.01	110	-5.66	112	-5.2	113	1.03	454	1.8	300	3.73	323	0.567661	0.334693	0.285029	0.176373	0.574427	0.470062	0.26998	0.310313	0.353408	0.31048	0.239835	0.21553	0.606473	0.505189	0.383189	0.333016
39	2	2	34	16	#NULL!	#NULL!	#NULL!	#NULL!	#NULL!		22	23	23	#NULL!	356.189	396.265	295.041	958.075	1488.09	1583.58	5077.24	-5.74	115	-6.78	111	-4.93	110	12.37	268	15.74	270	14.17	289	0.531458	0.821203	0.479432	0.846308	0.769868	0.933607	0.976932	1.4934	0.945043	1.25144	0.354857	0.23597	0.707175	0.541526	1.81825	1.98226
41	2	2	34	16	#NULL!	#NULL!	#NULL!	#NULL!	#NULL!		9	8	17	#NULL!	359.302	342.117	289.836	868.775	883.48	985.577	3729.09	-7.52	129	-6.7	125	-4.28	109	9.76	277	9.99	276	8.74	313	0.539567	0.607806	0.362777	0.591874	0.627468	0.594906	0.438234	1.20745	0.452689	1.21801	0.290535	0.306319	0.472081	0.754915	1.31523	1.09803
45	2	1	22	12	#NULL!	#NULL!	#NULL!	#NULL!	#NULL!		23	29	26	#NULL!	375.005	481.1	400.819	690.563	999.923	1126.28	4073.68	-7.76	143	-8.9	112	-7.07	111	11.17	324	12.57	328	12.47	331	0.634241	0.570391	0.829571	0.589828	0.682092	0.68604	1.67226	1.27004	1.52032	1.54202	0.287262	0.313892	0.511302	0.815932	1.46185	1.81831
46	2	2	41	16	#NULL!	#NULL!	#NULL!	#NULL!	#NULL!		21	22	33	#NULL!	480.391	649.551	706.862	1054.77	1556.14	1836.49	6284.2	-7.72	89	-9.83	92	-10.71	95	9.74	338	11.98	335	14.25	335	1.49538	1.1781	0.878313	0.629009	1.59234	1.3781	1.27855	0.905563	1.08752	0.702916	0.260405	0.166889	0.540372	0.408692	1.90319	1.68246
47	2	2	60	12	#NULL!	#NULL!	#NULL!	#NULL!	#NULL!		27	26	34	#NULL!	304.276	432.942	471.251	138.637	532.976	792.92	2673	-8.96	88	-10.73	90	-9.7	96	4.46	279	6.03	280	6.43	399	1.95643	1.73992	1.38284	1.48281	2.10362	1.83259	1.82527	2.0807	1.05175	1.35948	0.259396	0.215384	0.565343	0.457679	2.64564	2.39749
48	2	2	62	16	40	#NULL!	#NULL!	#NULL!	#NULL!	setraline, Lorazepam, Venlafax	18	22	19	#NULL!	177.676	151.694	168.263	95.8491	21.0698	159.176	773.727	-3.6	118	-3.77	116	-3	112	1.8	377	0.86	357	1.76	358	0.833918	1.30973	0.63873	0.831987	0.436272	0.637904	0.614183	0.452311	0.647765	0.570275	0.140813	0.25316	0.233976	0.316469	0.974672	1.17486
49	2	1	29	12	#NULL!	#NULL!	#NULL!	#NULL!	#NULL!		17	12	32	#NULL!	232.83	374.939	479.065	202.759	509.176	967.09	2765.86	-6.17	149	-7.35	149	-6.58	146	2.73	446	4.26	444	5.88	386	2.36385	1.40703	1.94914	1.33367	2.33742	1.79134	2.26623	2.67502	2.05302	2.85313	0.237073	0.226066	0.987968	1.18899	1.33395	0.996499
53	2	2	61	6	#NULL!	#NULL!	#NULL!	#NULL!	#NULL!		16	29	41	#NULL!	507.353	542.714	670.19	1243.04	1422.37	1761.03	6146.71	-8.32	68	-10.16	91	-14.22	96	10.23	281	13.46	277	15.44	355	1.66016	2.19088	1.41434	1.82048	2.15129	2.3798	1.93076	1.67091	1.76363	1.39404	2.02427	1.35814	4.28383	3.32657	3.13513	3.96095
54	2	2	45	12	34	#NULL!	#NULL!	#NULL!	#NULL!	Venlafaxine	17	11	21	#NULL!	292.841	383.069	304.658	1383.32	1192.16	1063.76	4619.8	-5.61	89	-8.09	94	-4.98	99	14.39	320	11.66	335	10.01	352	1.0337	1.0671	0.770704	0.752662	1.14285	1.24573	1.0916	1.50077	0.931906	1.20248	0.385472	0.437964	1.5852	2.19275	1.94303	1.55402
55	2	1	22	12	#NULL!	#NULL!	#NULL!	#NULL!	#NULL!		19	35	40	#NULL!	402.988	423.683	496.049	87.4551	225.921	524.51	2160.61	-8.39	110	-7.5	109	-6.67	126	3.42	356	5.01	358	6.79	350	1.82176	2.00613	0.880121	1.33832	1.54607	1.61408	0.912705	1.49264	1.0964	1.64587	0.876995	0.391157	1.01104	0.982169	1.62025	1.54467
56	2	1	31	12	#NULL!	#NULL!	#NULL!	#NULL!	#NULL!		19	20	42	#NULL!	629.495	653.515	563.942	776.67	847	1078.84	4549.46	-11.66	91	-12.02	90	-8.99	86	11.83	345	10.26	348	10.22	353	2.35676	1.49803	1.19524	1.33808	2.07084	1.67292	0.999301	1.99218	0.861818	1.29594	0.40633	0.549686	0.998902	0.763876	1.96939	1.37031
57	2	1	32	14	#NULL!	#NULL!	#NULL!	#NULL!	#NULL!		23	23	18	#NULL!	390.545	443.292	479.974	602.378	931.537	1533.77	4381.5	-8.5	100	-9.33	101	-8.65	114	7.57	329	10.19	327	11.31	330	0.484104	0.589473	0.314955	0.43414	0.872841	1.03206	0.419404	0.626871	0.376341	0.711508	0.241343	0.29067	0.987269	0.83264	1.19076	0.961654
60	2	2	35	14	#NULL!	#NULL!	#NULL!	#NULL!	#NULL!		16	18	14	#NULL!	250.312	344.201	336.458	421.447	599.475	713.078	2664.97	-6.24	106	-7.95	109	-6.69	111	6.26	364	7.51	366	7.54	384	1.01329	0.752413	0.797238	0.570698	1.10994	0.861179	0.907991	0.826915	0.703677	0.515101	0.358637	0.167586	0.649354	0.425113	1.83043	1.2597
61	2	2	40	16	#NULL!	#NULL!	#NULL!	#NULL!	#NULL!		23	27	37	#NULL!	563.229	810.043	809.38	825.582	1365.67	1941.96	6315.87	-10.31	105	-14.05	116	-12.56	119	7.72	309	10.41	306	13	340	1.24281	1.60519	0.808431	1.21995	1.38497	1.57996	0.986313	1.43981	0.846382	1.16633	0.288339	0.484279	0.753314	0.979834	1.42214	2.45397
63	2	1	24	12	#NULL!	#NULL!	#NULL!	#NULL!	#NULL!		15	17	6	#NULL!	282.23	419.291	472.884	702.546	836.41	1172.05	3885.41	-5.12	121	-7.27	123	-7.13	94	10.76	316	11.04	319	12.73	317	0.85137	1.46762	0.57586	1.14556	0.812935	1.10201	0.926272	0.942578	0.925012	0.849548	1.34006	0.437458	4.51523	1.52105	2.39256	3.28416
64	2	2	37	14	#NULL!	#NULL!	#NULL!	#NULL!	#NULL!		19	19	36	#NULL!	417.693	524.074	426.258	849.662	1322.51	1363.12	4903.31	-7.1	99	-9.89	99	-7.24	101	9.3	321	12.45	321	10.38	318	1.89122	1.95576	1.62372	2.45136	1.75073	1.71167	2.53231	4.50463	1.30178	2.7028	0.428983	0.275233	0.813344	0.792932	2.70009	3.9711
65	2	1	31	12	#NULL!	#NULL!	#NULL!	#NULL!	#NULL!		18	25	31	#NULL!	378.012	456.199	467.655	907.225	931.252	954.982	4095.32	-7.62	141	-7.23	104	-7.66	106	11.28	336	11.85	321	9.92	321	1.38458	2.71188	0.820572	2.2539	1.22603	1.7103	0.800403	1.23022	0.763142	0.880172	0.212677	0.444922	0.357136	0.663658	1.52976	3.78406
68	2	2	33	12	#NULL!	#NULL!	#NULL!	#NULL!	#NULL!		25	30	48	#NULL!	191.414	271.63	250.176	371.917	662.491	773.319	2520.95	-5.4	105	-6.61	107	-5.09	110	4.51	310	7.36	304	5.35	401	0.591091	0.45658	0.335175	0.210511	0.66511	0.565256	0.291018	0.326266	0.280741	0.264006	0.175896	0.101094	0.649264	0.643558	1.03189	0.994884
69	2	1	24	12	#NULL!	#NULL!	#NULL!	#NULL!	#NULL!		11	8	9	#NULL!	353.727	383.485	376.171	216.019	378.406	644.92	2352.73	-6.58	137	-6.56	135	-5.89	90	3.76	441	5.87	421	7.89	417	0.554473	0.265627	0.506128	0.152163	0.413506	0.304212	0.456729	0.225956	0.40269	0.231006	0.211732	0.102718	0.753251	0.487274	0.607866	0.696505
70	2	2	53	12	#NULL!	#NULL!	#NULL!	#NULL!	#NULL!		13	16	27	#NULL!	315.145	358.449	278.13	261.754	251.882	407.582	1872.94	-6.07	93	-5.72	95	-4.67	124	4.48	378	4.31	375	3.74	378	2.26554	3.83727	1.52255	2.82496	2.32436	2.95513	2.06222	2.83692	1.19445	2.02587	0.473031	0.228201	0.769722	0.692641	4.48025	4.87248
72	2	2	42	16	#NULL!	#NULL!	#NULL!	#NULL!	#NULL!		7	8	14	#NULL!	377.418	415.314	262.192	454.324	507.88	634.698	2651.83	-7.06	108	-8.67	105	-5.87	105	6.46	345	6.98	347	6.8	351	0.784321	0.928807	0.311694	0.664098	0.891974	0.873249	0.233594	0.660451	0.303648	0.465447	0.189341	0.594528	0.422809	0.985013	1.02827	1.04752
75	2	2	46	12	#NULL!	#NULL!	#NULL!	#NULL!	#NULL!		21	22	12	#NULL!	505.929	659.08	621.447	918.292	1272.93	1417.67	5395.35	-7.06	104	-8.83	98	-8.39	103	9.74	302	14.02	303	12.51	310	2.15131	1.29388	1.32095	1.07446	1.9168	1.3592	1.54773	1.4678	0.948509	1.44481	0.405777	0.303331	0.51313	0.532432	4.04621	2.8948
76	2	1	37	16	36	#NULL!	#NULL!	#NULL!	#NULL!	Venlafaxine	29	35	35	#NULL!	126.942	207.383	201.246	79.1335	139.607	440.291	1194.6	-2.52	146	-4.11	141	-3.44	112	2.56	389	3.18	399	3.79	387	1.99249	1.84546	1.30488	1.44588	1.69084	1.49191	1.60677	1.84323	1.33572	1.13196	0.073222	0.258726	0.076693	0.088358	1.81633	2.0982
77	2	1	42	12	41	#NULL!	#NULL!	#NULL!	#NULL!		26	34	55	#NULL!	310.551	256.955	132.764	171.546	241.199	319.442	1432.46	-5.82	107	-4.81	112	-3.05	119	4.69	280	5.37	282	3.95	284	0.501713	0.37876	0.301848	0.18773	0.500242	0.437969	0.474405	0.255257	0.490874	0.390762	0.115807	0.12511	0.232606	0.299253	0.372292	0.291154
78	2	2	51	16	51	#NULL!	#NULL!	#NULL!	#NULL!	Paroxetine, Alprazolam	25	32	47	#NULL!	357.179	512.581	535.394	428.011	575.223	669.255	3077.64	-8.28	89	-10.8	88	-10.5	86	7.2	354	8.12	357	5.97	357	0.97167	0.995802	0.795994	0.942134	1.0803	1.02919	1.08776	1.31767	1.02501	1.07835	0.411549	0.245908	0.556338	0.470071	1.25574	1.71388
79	2	2	49	16	#NULL!	#NULL!	#NULL!	#NULL!	#NULL!		19	20	19	#NULL!	582.834	703.141	615.307	1370.72	1457.95	1303.47	6033.42	-9.62	92	-11.03	95	-10.2	99	11.98	340	12.38	329	11.43	327	1.03244	1.87949	0.986649	2.53587	1.01149	1.31396	2.0501	3.74926	2.24407	2.84896	0.351619	0.205419	0.780084	0.567467	1.81918	1.75324
81	2	2	48	12	#NULL!	#NULL!	#NULL!	#NULL!	#NULL!		32	35	32	#NULL!	540.551	580.189	430.134	122.877	199.574	535.059	2408.38	-9.38	102	-9.69	105	-6.59	107	2.73	380	3.62	383	4.88	388	1.76854	0.688746	1.14831	0.363945	1.47041	0.773544	1.25751	0.450331	0.690256	0.343194	0.147274	0.102594	0.590056	0.426415	2.0239	0.935486
82	2	2	37	16	#NULL!	#NULL!	#NULL!	#NULL!	#NULL!		22	21	33	#NULL!	689.453	701.365	535.885	1029.99	1299.14	1345.18	5601.01	-13.03	118	-14.02	121	-10.1	121	15.8	296	18.05	295	16.21	297	0.493366	0.633022	0.546333	0.794821	0.571264	0.540989	0.889569	1.27593	1.42862	1.95577	0.647826	0.582768	1.68012	2.72643	1.05205	1.36221
83	2	2	40	16	#NULL!	#NULL!	#NULL!	#NULL!	#NULL!		21	25	25	#NULL!	359.087	439.095	378.012	964.426	1136.32	1059.29	4336.23	-9.75	103	-11.54	102	-9.64	100	12.3	321	12.8	320	9.86	339	1.43749	1.88589	1.07953	1.43126	1.44504	1.60925	1.84502	1.7403	1.52347	1.30209	0.480098	0.173394	0.576542	0.597591	2.57926	2.68765
84	2	2	48	16	33	#NULL!	#NULL!	#NULL!	#NULL!	Mirtzapine	22	17	28	#NULL!	498.221	491.416	384.591	531.858	536.611	498.374	2941.07	-9.16	88	-9.15	90	-6.62	91	6.51	315	6.61	315	5.73	314	0.745637	0.617953	0.902051	1.16163	0.566183	0.572493	1.92721	1.46035	2.95192	1.49613	2.64245	2.3097	0.836085	1.92252	0.744709	0.487545
86	2	2	31	14	#NULL!	#NULL!	#NULL!	#NULL!	#NULL!		27	28	38	#NULL!	372.199	620.96	593.473	535.002	836.541	949.712	3907.89	-7.26	123	-10.82	123	-8.91	123	7.47	354	8.89	352	9	352	1.5257	1.58028	0.855716	0.863108	1.25427	1.22322	0.768331	0.65371	0.87515	0.502072	0.596124	0.508112	0.877039	0.912804	2.94679	1.98465
87	2	1	56	16	#NULL!	#NULL!	#NULL!	#NULL!	#NULL!		16	22	6	#NULL!	298.391	268.32	235.707	496.274	485.875	568.456	2353.02	-6.66	74	-5.6	75	-5.58	72	10.84	358	9.13	358	8.83	361	0.884414	2.31477	0.929252	1.91418	0.974486	1.36718	1.44727	1.79543	1.20782	2.21507	0.672824	0.242138	0.538627	0.553541	3.0068	3.08004
88	2	2	44	14	26	#NULL!	#NULL!	#NULL!	#NULL!	Lorazepam	27	23	28	#NULL!	114.65	150.886	250.567	154.585	132.801	536.328	1339.82	-3.06	106	-3.61	109	-4.94	111	2.68	398	2.76	398	5.59	400	1.7669	2.24758	1.04332	1.54523	1.61516	1.64132	1.16454	1.09558	1.26711	0.627469	0.906529	0.189516	0.329519	0.169934	1.60378	2.09804
89	3	1	35	16	#NULL!	#NULL!	#NULL!	#NULL!	#NULL!		#NULL!	#NULL!	5	#NULL!	168.267	157.274	232.186	251.395	471.407	722.384	2002.91	-4.19	96	-3.31	91	-4.16	119	6.29	339	8.52	343	8.59	353	1.1483	1.17932	0.756687	0.813464	1.10479	1.16074	0.850019	1.29655	1.03609	1.37793	0.598569	0.963289	2.32453	2.05419	2.30663	2.0191
90	3	2	42	12	#NULL!	#NULL!	#NULL!	#NULL!	#NULL!		#NULL!	#NULL!	2	#NULL!	757.101	724.927	452.379	1327.09	1532.23	1061.83	5855.56	-9.29	85	-8.66	84	-5.81	81	12.99	322	14.79	305	10.42	300	0.8547	2.34459	0.779601	1.48174	1.12335	1.79087	1.55415	1.6648	1.41207	1.79401	1.02912	1.31076	1.55096	1.43882	1.80741	2.36637
91	3	1	64	12	#NULL!	#NULL!	#NULL!	#NULL!	#NULL!		#NULL!	#NULL!	7	#NULL!	529.75	656.389	474.45	739.464	1088.92	1367.03	4856	-10.78	98	-10.84	102	-7.58	123	7.56	340	8.67	347	10.27	296	2.84855	1.74049	1.81508	1.23812	2.84652	2.29617	1.60473	2.07422	1.27904	1.87562	0.954281	0.693765	2.30184	2.49318	2.48797	2.1176
92	3	2	63	18	#NULL!	#NULL!	#NULL!	#NULL!	#NULL!		#NULL!	#NULL!	14	#NULL!	525.542	591.848	365.17	684.376	1248.23	1286.05	4701.21	-9.08	94	-9.83	105	-5.8	111	7.71	375	13.08	377	12.46	381	0.978108	1.16403	0.641084	1.07612	0.912165	1.00822	0.731619	1.75669	1.84198	2.50752	0.831119	0.813047	2.94126	2.15714	2.23077	2.70052
93	3	2	62	12	#NULL!	#NULL!	#NULL!	#NULL!	#NULL!		#NULL!	#NULL!	7	#NULL!	576.951	717.168	353.132	632.363	1413.31	1031	4723.92	-8.2	85	-10.64	84	-6.63	81	8.46	357	12.46	333	10.34	333	3.41995	4.25578	1.40613	1.54334	3.8798	3.72409	1.56043	1.19401	2.87331	1.31854	3.23162	1.65367	4.52917	3.16754	5.71218	4.69226
94	3	2	45	16	#NULL!	#NULL!	#NULL!	#NULL!	#NULL!		#NULL!	#NULL!	15	#NULL!	397.269	345.224	152.331	564.007	814.488	466.07	2739.39	-7.12	104	-6.9	105	-3.28	102	5.89	334	7.54	285	5.1	286	0.848688	1.06865	0.734736	1.21611	0.951928	1.06123	1.21164	2.32105	1.13776	1.68517	1.2044	0.740935	1.23372	1.23153	1.27046	1.45386
95	3	1	43	16	#NULL!	#NULL!	#NULL!	#NULL!	#NULL!		#NULL!	#NULL!	8	#NULL!	333.04	424.06	276.937	510.559	753.591	692.033	2990.22	-6.23	102	-7.91	108	-5.15	112	6.68	366	9.51	370	8.1	372	0.844559	0.826915	0.539989	0.478744	0.712585	0.764711	0.511412	0.355582	0.478847	0.303383	0.646155	0.388039	1.1931	0.919855	1.3097	1.31461
97	3	1	61	18	#NULL!	#NULL!	#NULL!	#NULL!	#NULL!		#NULL!	#NULL!	8	#NULL!	352.416	410.16	349.232	637.322	951.728	959.826	3660.68	-4.85	124	-5.95	122	-4.7	101	5.83	334	8.24	293	8.07	297	1.14116	1.22246	0.967999	1.0156	1.06286	1.07412	1.65567	1.26838	1.69637	0.966085	0.179441	0.242467	0.336793	0.406343	2.74641	2.85106
98	3	2	52	15	#NULL!	#NULL!	#NULL!	#NULL!	#NULL!		#NULL!	#NULL!	8	#NULL!	581.296	469.846	366.072	597.503	472.293	702.982	3189.99	-9.89	110	-8.78	107	-6.11	80	8.72	332	7.15	327	8.45	324	2.04713	3.10836	1.0699	1.74471	2.14591	2.28179	1.13427	1.94847	1.44801	1.89462	1.60276	2.87033	2.30005	2.38518	3.84607	4.24489
100	3	2	35	18	#NULL!	#NULL!	#NULL!	#NULL!	#NULL!		#NULL!	#NULL!	2	#NULL!	677.802	574.545	349.472	1630.42	1468.36	1136.89	5837.48	-12.2	95	-11.79	97	-8.38	100	15.04	334	13.42	326	10.95	318	0.712006	0.532966	0.675538	0.713362	0.956395	0.905198	1.33678	2.47221	1.42527	2.5596	0.33926	0.56275	1.32801	1.24919	2.50193	1.81667
101	3	2	32	16	#NULL!	#NULL!	#NULL!	#NULL!	#NULL!		#NULL!	#NULL!	27	#NULL!	395.392	455.945	389.682	892.721	903.736	985.836	4023.31	-7.6	131	-8.78	125	-5.63	120	10.56	318	10.08	316	9.54	317	1.06905	1.28787	1.04003	1.05779	0.928515	1.13311	0.89646	1.10431	1.01014	1.02206	1.75609	0.817324	0.978969	0.973983	2.03603	2.11909
102	3	2	37	14	#NULL!	#NULL!	#NULL!	#NULL!	#NULL!		#NULL!	#NULL!	25	#NULL!	442.171	494.434	438.673	842.559	941.54	1093.15	4252.52	-9.45	90	-9.38	91	-6.5	92	10.18	316	10.47	318	10.6	321	1.82973	1.28801	1.36234	1.09346	1.66298	1.23986	2.06745	1.57277	1.5404	1.39158	0.381932	0.444255	1.19381	1.1857	4.29406	3.22076
103	3	1	44	16	#NULL!	#NULL!	#NULL!	#NULL!	#NULL!		#NULL!	#NULL!	4	#NULL!	309.162	387.678	350.171	387.107	775.92	866.486	3076.52	-6.74	120	-8.65	120	-7.04	122	4.7	364	6.56	387	8	389	1.02211	1.48124	0.611841	1.18947	0.770723	0.953338	0.573994	1.16419	0.553622	1.027	0.186877	0.338041	0.529705	0.652495	1.93746	2.80343
104	3	1	27	16	#NULL!	#NULL!	#NULL!	#NULL!	#NULL!		#NULL!	#NULL!	3	#NULL!	221.917	262.306	240.121	264.77	486.745	648.788	2124.65	-4.68	123	-5.46	121	-5.75	117	5.71	338	7.64	337	6.73	340	1.37807	0.537981	1.11887	0.524589	1.21296	0.691395	1.38074	1.03021	0.943207	0.677169	0.660032	0.270643	1.47431	0.670276	1.66711	2.09836
105	3	2	48	14	#NULL!	#NULL!	#NULL!	#NULL!	#NULL!		#NULL!	#NULL!	11	#NULL!	552.36	551.016	494.633	1399.92	1692.25	1607.52	6297.7	-9.14	95	-8.71	116	-8.2	117	15.65	357	17.1	341	15.74	302	1.18297	1.57922	1.50742	1.28058	1.22635	1.44255	3.83946	2.04754	2.7721	1.44101	0.605773	0.632794	1.13704	0.908265	2.26367	2.48457
106	3	1	53	14	#NULL!	#NULL!	#NULL!	#NULL!	#NULL!		#NULL!	#NULL!	7	#NULL!	352.442	318.843	186.666	78.7853	526.821	580.071	2043.63	-8.88	93	-7.51	90	-4.26	84	1.99	375	4.83	370	5.56	364	2.04953	1.42844	1.16405	0.583388	1.43834	1.23365	1.05289	0.719553	1.30217	0.938089	0.872054	0.503133	0.994427	0.818282	2.01089	1.21444
107	3	1	27	16	#NULL!	#NULL!	#NULL!	#NULL!	#NULL!		#NULL!	#NULL!	8	#NULL!	424.945	503.8	402.334	1022.43	1683.71	1714.75	5751.97	-6.62	125	-6.18	82	-7.25	61	14.41	326	18.81	321	17.19	306	0.971804	1.48987	0.561345	0.901711	1.24046	1.28537	0.752845	0.741147	1.03266	0.6894	0.769468	0.717528	1.96585	2.21176	2.27739	2.64866
108	3	2	58	14	#NULL!	#NULL!	#NULL!	#NULL!	#NULL!		#NULL!	#NULL!	25	#NULL!	591.88	591.274	486.755	1020.7	1123.17	1371.09	5184.86	-8.03	141	-8.75	140	-7.5	142	13.4	319	14.26	310	15.64	321	0.674596	1.18031	0.441062	1.30479	0.7552	0.895082	1.12634	2.27578	1.08498	1.91414	0.239859	0.51342	0.599679	0.660497	1.29096	1.31972
109	3	2	21	14	#NULL!	#NULL!	#NULL!	#NULL!	#NULL!		#NULL!	#NULL!	8	#NULL!	379.093	553.361	435.911	635.642	1076.53	1508.13	4588.67	-8.87	128	-12.6	128	-7.98	126	12.16	363	17.09	362	15.66	358	1.46894	1.78063	0.996662	1.06243	1.66542	1.75128	1.72086	1.49307	2.04394	2.2444	0.717427	0.658542	2.83232	2.9714	2.97415	3.23154
110	3	2	56	16	#NULL!	#NULL!	#NULL!	#NULL!	#NULL!		#NULL!	#NULL!	19	#NULL!	678.011	411.259	223.583	676.189	379.688	536.078	2904.81	-11.52	98	-9.51	104	-5.92	106	11.35	336	6.61	335	5.65	337	1.82427	2.75839	1.38923	1.80353	2.03484	2.36528	1.54216	2.254	1.78011	1.57493	0.833631	1.50202	0.817375	0.757111	2.88533	3.5833
111	3	1	24	16	#NULL!	#NULL!	#NULL!	#NULL!	#NULL!		#NULL!	#NULL!	3	#NULL!	488.408	591.545	510.987	845.599	1033.91	1276.94	4747.39	-7.67	86	-8.58	96	-6.76	103	12.04	352	13.31	349	13.43	347	0.779937	1.17337	0.732593	1.24534	0.923204	0.889796	1.27887	1.58389	1.42491	1.67833	0.464197	0.506326	1.28673	1.48125	1.92511	2.41864
112	3	1	33	15	#NULL!	#NULL!	#NULL!	#NULL!	#NULL!		#NULL!	#NULL!	0	#NULL!	480.305	471.765	240.135	117.071	543.969	833.794	2687.04	-8.11	109	-6.96	109	-3.57	76	2.77	365	7.51	360	9.12	364	1.52871	2.81485	0.893684	3.13177	1.64956	2.11314	1.37787	2.30212	1.81584	2.32174	0.593745	0.700592	1.23026	1.71508	1.88489	2.98347
113	3	2	23	15	#NULL!	#NULL!	#NULL!	#NULL!	#NULL!		#NULL!	#NULL!	7	#NULL!	336.524	509.036	355.93	489.056	850	1499.3	4039.85	-7.24	126	-11.33	127	-6.08	131	7.3	359	9.6	327	13.87	321	1.30859	2.48688	0.68943	2.17475	1.51216	1.98425	0.934155	2.92674	1.00082	2.25326	0.547178	0.860206	1.82171	2.1473	3.06477	3.4415
114	3	1	47	15	#NULL!	#NULL!	#NULL!	#NULL!	#NULL!		#NULL!	#NULL!	0	#NULL!	307.112	341.534	304.178	432.598	638.77	773.653	2797.84	-4.95	103	-5.62	112	-4.72	114	4.26	357	5.88	357	6.35	354	0.697948	1.45561	0.505298	0.968866	0.56504	0.955337	0.814022	1.40901	1.42843	0.99923	0.480019	0.549193	1.15924	1.27481	1.3407	1.20386
116	3	1	34	16	#NULL!	#NULL!	#NULL!	#NULL!	#NULL!		#NULL!	#NULL!	15	#NULL!	366.906	451.136	402.33	543.831	677.468	800.783	3242.45	-7.01	113	-7.86	114	-5.22	114	6.28	320	6.92	316	7.41	313	0.391109	0.717678	0.469543	0.771805	0.419156	0.538983	0.950775	1.31218	1.3355	1.54571	0.329798	0.272006	0.72815	0.74449	0.86546	1.38476
117	3	2	60	16	#NULL!	#NULL!	#NULL!	#NULL!	#NULL!		#NULL!	#NULL!	2	#NULL!	510.757	432.97	247.756	471.617	654.431	781.783	3099.31	-9.05	90	-7.66	102	-4.82	108	4.83	357	5.41	283	6.27	323	1.32949	1.50361	0.690681	0.858348	1.28567	1.36271	0.814669	1.07131	0.819856	0.950405	0.95001	0.294593	1.4599	1.07881	1.57488	1.36039
118	3	1	45	16	#NULL!	#NULL!	#NULL!	#NULL!	#NULL!		#NULL!	#NULL!	9	#NULL!	540.459	626.236	414.284	991.234	1443.08	1324.71	5340	-7.93	94	-8.53	93	-5.33	155	10.24	326	12.59	292	10.96	291	1.15027	1.57762	0.940888	1.2673	0.992865	1.16107	0.98265	1.16433	1.46075	1.09145	1.05186	0.799593	1.35065	0.972321	2.18037	2.65393
119	3	1	43	16	#NULL!	#NULL!	#NULL!	#NULL!	#NULL!		#NULL!	#NULL!	4	#NULL!	393.68	338.053	282.003	211.997	602.712	856.964	2685.41	-10.53	100	-8.59	104	-5.04	113	4.37	358	7.46	356	9.89	357	0.89431	1.10702	0.712022	0.944304	0.83097	0.996906	1.08114	0.83894	1.2638	1.23548	0.648517	0.670008	1.50504	1.23493	2.00928	1.63339
120	3	1	53	14	#NULL!	#NULL!	#NULL!	#NULL!	#NULL!		#NULL!	#NULL!	20	#NULL!	553.31	525.075	306.002	520.679	545.39	428.856	2879.31	-10.1	95	-10.45	97	-6.87	98	8.19	329	6.44	332	3.98	334	0.963569	0.765725	0.525288	0.617195	1.09718	0.987731	0.446104	0.916263	0.713614	0.989006	0.346992	0.331218	0.7949	0.58649	0.64062	0.686604
121	3	2	42	16	#NULL!	#NULL!	#NULL!	#NULL!	#NULL!		#NULL!	#NULL!	7	#NULL!	907.28	826.973	558.668	222.248	235.295	1322.99	4073.46	-17.71	93	-13.34	93	-8	82	4.75	351	6.02	354	14.02	360	3.62479	10.4031	1.28879	7.2871	5.04366	7.8359	1.2006	7.92956	2.36452	5.89709	2.69271	3.01835	6.12654	4.85262	6.30368	6.78763
[truncated: 15 more columns]
